# Supplementary material
Source: MDPI journal article supplement (https://www.mdpi.com/2304-6740/4/4/29)
Supplement: s1 [file s1]

Archive with 4 entries (4 files):
- Zn2NBr0.62I0.38.cif
- Zn2NBr0.62I0.38_checkcif.pdf
- Zn2NCl0.47Br0.53.cif
- Zn2NCl0.47Br0.53_checkcif.pdf
