# Supplementary material
Source: MDPI journal article supplement (https://www.mdpi.com/2304-6740/4/4/29)
Supplement: s1 [file s1 › Zn2NBr0.62I0.38.cif]

 
data_yanqi01_pnma
 
_audit_creation_method            SHELXL-97
_chemical_name_systematic
;
 ?
;
_chemical_name_common             ?
_chemical_melting_point           ?
_chemical_formula_moiety          'Br0.62 I0.38 N Zn2'
_chemical_formula_sum
 'Br0.62 I0.38 N Zn2'
_chemical_formula_weight          242.55
 
loop_
 _atom_type_symbol
 _atom_type_description
 _atom_type_scat_dispersion_real
 _atom_type_scat_dispersion_imag
 _atom_type_scat_source
 'N'  'N'   0.0061   0.0033
 'International Tables Vol C Tables 4.2.6.8 and 6.1.1.4'
 'Zn'  'Zn'   0.2839   1.4301
 'International Tables Vol C Tables 4.2.6.8 and 6.1.1.4'
 'Br'  'Br'  -0.2901   2.4595
 'International Tables Vol C Tables 4.2.6.8 and 6.1.1.4'
 'I'  'I'  -0.4742   1.8119
 'International Tables Vol C Tables 4.2.6.8 and 6.1.1.4'
 
_symmetry_cell_setting            orthorhombic
_symmetry_space_group_name_H-M    Pnma
 
loop_
 _symmetry_equiv_pos_as_xyz
 'x, y, z'
 '-x+1/2, -y, z+1/2'
 '-x, y+1/2, -z'
 'x+1/2, -y+1/2, -z+1/2'
 '-x, -y, -z'
 'x-1/2, y, -z-1/2'
 'x, -y-1/2, z'
 '-x-1/2, y-1/2, z-1/2'
 
_cell_length_a                    6.249(4)
_cell_length_b                    6.164(4)
_cell_length_c                    7.824(5)
_cell_angle_alpha                 90.00
_cell_angle_beta                  90.00
_cell_angle_gamma                 90.00
_cell_volume                      301.4(3)
_cell_formula_units_Z             4
_cell_measurement_temperature     293(2)
_cell_measurement_reflns_used     1256
_cell_measurement_theta_min       5.21
_cell_measurement_theta_max       33.24
 
_exptl_crystal_description        block
_exptl_crystal_colour             colorless
_exptl_crystal_size_max           0.05
_exptl_crystal_size_mid           0.04
_exptl_crystal_size_min           0.01
_exptl_crystal_density_meas       ?
_exptl_crystal_density_diffrn     5.345
_exptl_crystal_density_method     'not measured'
_exptl_crystal_F_000              444
_exptl_absorpt_coefficient_mu     27.346
_exptl_absorpt_correction_type    'multi-scan'
_exptl_absorpt_correction_T_min   0.2901
_exptl_absorpt_correction_T_max   0.7466
_exptl_absorpt_process_details    'SADABS'
 
_exptl_special_details
;
 ?
;
 
_diffrn_ambient_temperature       293(2)
_diffrn_radiation_wavelength      0.71073
_diffrn_radiation_type            MoK\a
_diffrn_radiation_source          'fine-focus sealed tube'
_diffrn_radiation_monochromator   graphite
_diffrn_measurement_device_type   'Bruker APEX-II CCD'
_diffrn_measurement_method        '\f and \w scans'
_diffrn_detector_area_resol_mean  ?
_diffrn_standards_number          0
_diffrn_standards_interval_count  ?
_diffrn_standards_interval_time   ?
_diffrn_standards_decay_%         ?
_diffrn_reflns_number             2215
_diffrn_reflns_av_R_equivalents   0.0326
_diffrn_reflns_av_sigmaI/netI     0.0316
_diffrn_reflns_limit_h_min        -7
_diffrn_reflns_limit_h_max        9
_diffrn_reflns_limit_k_min        -9
_diffrn_reflns_limit_k_max        9
_diffrn_reflns_limit_l_min        -12
_diffrn_reflns_limit_l_max        6
_diffrn_reflns_theta_min          5.21
_diffrn_reflns_theta_max          33.36
_reflns_number_total              630
_reflns_number_gt                 585
_reflns_threshold_expression      >2\s(I)
 
_computing_data_collection        'Bruker APEX2'
_computing_cell_refinement        'Bruker SAINT'
_computing_data_reduction         'Bruker SAINT'
_computing_structure_solution     'SHELXL-97 (Sheldrick, 2008)'
_computing_structure_refinement   'SHELXL-97 (Sheldrick, 2008)'
_computing_molecular_graphics     'Bruker SHELXTL'

_computing_publication_material   'Bruker SHELXTL'

 
_refine_special_details
;
 Refinement of F^2^ against ALL reflections.  The weighted R-factor wR and
 goodness of fit S are based on F^2^, conventional R-factors R are based
 on F, with F set to zero for negative F^2^. The threshold expression of
 F^2^ > 2\s(F^2^) is used only for calculating R-factors(gt) etc. and is
 not relevant to the choice of reflections for refinement.  R-factors based
 on F^2^ are statistically about twice as large as those based on F, and R-
 factors based on ALL data will be even larger.
;
 
_refine_ls_structure_factor_coef  Fsqd
_refine_ls_matrix_type            full
_refine_ls_weighting_scheme       calc
_refine_ls_weighting_details
 'calc w=1/[\s^2^(Fo^2^)+(0.0963P)^2^+0.0497P] where P=(Fo^2^+2Fc^2^)/3'
_atom_sites_solution_primary      direct
_atom_sites_solution_secondary    difmap
_refine_ls_extinction_method      SHELXL
_refine_ls_extinction_coef        0.028(4)
_refine_ls_extinction_expression
 'Fc^*^=kFc[1+0.001xFc^2^\l^3^/sin(2\q)]^-1/4^'
_refine_ls_number_reflns          630
_refine_ls_number_parameters      27
_refine_ls_number_restraints      0
_refine_ls_R_factor_all           0.0468
_refine_ls_R_factor_gt            0.0428
_refine_ls_wR_factor_ref          0.1394
_refine_ls_wR_factor_gt           0.1147
_refine_ls_goodness_of_fit_ref    1.177
_refine_ls_restrained_S_all       1.177
_refine_ls_shift/su_max           0.000
_refine_ls_shift/su_mean          0.000
 
loop_
 _atom_site_label
 _atom_site_type_symbol
 _atom_site_fract_x
 _atom_site_fract_y
 _atom_site_fract_z
 _atom_site_U_iso_or_equiv
 _atom_site_adp_type
 _atom_site_occupancy
 _atom_site_symmetry_multiplicity
 _atom_site_calc_flag
 _atom_site_refinement_flags
 _atom_site_disorder_assembly
 _atom_site_disorder_group
I1 I 0.92075(8) 0.7500 0.61964(7) 0.0173(3) Uani 0.380(12) 2 d SP . .
Br1 Br 0.92075(8) 0.7500 0.61964(7) 0.0173(3) Uani 0.620(12) 2 d SP . .
Zn1 Zn 0.13822(12) 0.7500 0.31289(12) 0.0222(3) Uani 1 2 d S . .
Zn2 Zn 0.0000 0.0000 0.0000 0.0318(4) Uani 1 2 d S . .
N1 N 0.0644(8) 0.2500 0.8716(7) 0.0108(9) Uani 1 2 d S . .
 
loop_
 _atom_site_aniso_label
 _atom_site_aniso_U_11
 _atom_site_aniso_U_22
 _atom_site_aniso_U_33
 _atom_site_aniso_U_23
 _atom_site_aniso_U_13
 _atom_site_aniso_U_12
I1 0.0148(4) 0.0170(4) 0.0200(4) 0.000 0.00094(17) 0.000
Br1 0.0148(4) 0.0170(4) 0.0200(4) 0.000 0.00094(17) 0.000
Zn1 0.0113(5) 0.0327(5) 0.0226(5) 0.000 -0.0053(3) 0.000
Zn2 0.0284(5) 0.0290(5) 0.0380(6) 0.0218(4) -0.0087(4) -0.0137(4)
N1 0.0078(17) 0.012(2) 0.013(2) 0.000 0.0002(15) 0.000
 
_geom_special_details
;
 All s.u.'s (except the s.u. in the dihedral angle between two l.s. planes)
 are estimated using the full covariance matrix.  The cell s.u.'s are taken
 into account individually in the estimation of s.u.'s in distances, angles
 and torsion angles; correlations between s.u.'s in cell parameters are only
 used when they are defined by crystal symmetry.  An approximate (isotropic)
 treatment of cell s.u.'s is used for estimating s.u.'s involving l.s. planes.
;
 
loop_
 _geom_bond_atom_site_label_1
 _geom_bond_atom_site_label_2
 _geom_bond_distance
 _geom_bond_site_symmetry_2
 _geom_bond_publ_flag
I1 Zn1 2.7579(17) 1_655 ?
I1 Zn1 3.1487(19) 5_676 ?
I1 Zn1 3.1487(19) 5_666 ?
Zn1 N1 1.914(5) 2_564 ?
Zn1 N1 1.920(5) 5_566 ?
Zn1 I1 2.7579(17) 1_455 ?
Zn1 Br1 2.7579(17) 1_455 ?
Zn1 Zn2 3.0188(15) 3 ?
Zn1 Zn2 3.0188(15) 1_565 ?
Zn1 Zn2 3.1032(14) 2_565 ?
Zn1 Zn2 3.1032(14) 4 ?
Zn1 I1 3.1487(19) 5_676 ?
Zn1 I1 3.1487(19) 5_666 ?
Zn2 N1 1.883(3) 5_556 ?
Zn2 N1 1.883(3) 1_554 ?
Zn2 Zn1 3.0188(15) 5_565 ?
Zn2 Zn1 3.0188(15) 1_545 ?
Zn2 Zn2 3.0822(19) 3 ?
Zn2 Zn2 3.0822(19) 3_545 ?
Zn2 Zn1 3.1032(14) 6_546 ?
Zn2 Zn1 3.1032(14) 2_564 ?
N1 Zn2 1.883(3) 3_556 ?
N1 Zn2 1.883(3) 1_556 ?
N1 Zn1 1.914(5) 2_565 ?
N1 Zn1 1.920(5) 5_566 ?
 
loop_
 _geom_angle_atom_site_label_1
 _geom_angle_atom_site_label_2
 _geom_angle_atom_site_label_3
 _geom_angle
 _geom_angle_site_symmetry_1
 _geom_angle_site_symmetry_3
 _geom_angle_publ_flag
Zn1 I1 Zn1 101.74(2) 1_655 5_676 ?
Zn1 I1 Zn1 101.74(2) 1_655 5_666 ?
Zn1 I1 Zn1 156.41(4) 5_676 5_666 ?
N1 Zn1 N1 145.14(16) 2_564 5_566 ?
N1 Zn1 I1 105.64(17) 2_564 1_455 ?
N1 Zn1 I1 109.22(16) 5_566 1_455 ?
N1 Zn1 Br1 105.64(17) 2_564 1_455 ?
N1 Zn1 Br1 109.22(16) 5_566 1_455 ?
I1 Zn1 Br1 0.000(18) 1_455 1_455 ?
N1 Zn1 Zn2 118.18(14) 2_564 3 ?
N1 Zn1 Zn2 37.04(8) 5_566 3 ?
I1 Zn1 Zn2 124.37(4) 1_455 3 ?
Br1 Zn1 Zn2 124.37(4) 1_455 3 ?
N1 Zn1 Zn2 118.18(14) 2_564 1_565 ?
N1 Zn1 Zn2 37.04(8) 5_566 1_565 ?
I1 Zn1 Zn2 124.37(4) 1_455 1_565 ?
Br1 Zn1 Zn2 124.37(4) 1_455 1_565 ?
Zn2 Zn1 Zn2 61.39(5) 3 1_565 ?
N1 Zn1 Zn2 34.87(8) 2_564 2_565 ?
N1 Zn1 Zn2 146.63(7) 5_566 2_565 ?
I1 Zn1 Zn2 87.05(5) 1_455 2_565 ?
Br1 Zn1 Zn2 87.05(5) 1_455 2_565 ?
Zn2 Zn1 Zn2 147.62(3) 3 2_565 ?
Zn2 Zn1 Zn2 109.72(3) 1_565 2_565 ?
N1 Zn1 Zn2 34.87(8) 2_564 4 ?
N1 Zn1 Zn2 146.63(7) 5_566 4 ?
I1 Zn1 Zn2 87.05(5) 1_455 4 ?
Br1 Zn1 Zn2 87.05(5) 1_455 4 ?
Zn2 Zn1 Zn2 109.72(3) 3 4 ?
Zn2 Zn1 Zn2 147.62(3) 1_565 4 ?
Zn2 Zn1 Zn2 59.55(4) 2_565 4 ?
N1 Zn1 I1 94.21(4) 2_564 5_676 ?
N1 Zn1 I1 92.80(4) 5_566 5_676 ?
I1 Zn1 I1 78.26(2) 1_455 5_676 ?
Br1 Zn1 I1 78.26(2) 1_455 5_676 ?
Zn2 Zn1 I1 127.03(3) 3 5_676 ?
Zn2 Zn1 I1 66.59(3) 1_565 5_676 ?
Zn2 Zn1 I1 61.32(3) 2_565 5_676 ?
Zn2 Zn1 I1 119.49(3) 4 5_676 ?
N1 Zn1 I1 94.21(4) 2_564 5_666 ?
N1 Zn1 I1 92.80(4) 5_566 5_666 ?
I1 Zn1 I1 78.26(2) 1_455 5_666 ?
Br1 Zn1 I1 78.26(2) 1_455 5_666 ?
Zn2 Zn1 I1 66.59(3) 3 5_666 ?
Zn2 Zn1 I1 127.03(3) 1_565 5_666 ?
Zn2 Zn1 I1 119.49(3) 2_565 5_666 ?
Zn2 Zn1 I1 61.32(3) 4 5_666 ?
I1 Zn1 I1 156.41(4) 5_676 5_666 ?
N1 Zn2 N1 180.0(3) 5_556 1_554 ?
N1 Zn2 Zn1 142.11(15) 5_556 5_565 ?
N1 Zn2 Zn1 37.89(15) 1_554 5_565 ?
N1 Zn2 Zn1 37.89(15) 5_556 1_545 ?
N1 Zn2 Zn1 142.11(15) 1_554 1_545 ?
Zn1 Zn2 Zn1 180.0 5_565 1_545 ?
N1 Zn2 Zn2 144.92(13) 5_556 3 ?
N1 Zn2 Zn2 35.08(13) 1_554 3 ?
Zn1 Zn2 Zn2 59.30(2) 5_565 3 ?
Zn1 Zn2 Zn2 120.70(2) 1_545 3 ?
N1 Zn2 Zn2 35.08(13) 5_556 3_545 ?
N1 Zn2 Zn2 144.92(13) 1_554 3_545 ?
Zn1 Zn2 Zn2 120.70(2) 5_565 3_545 ?
Zn1 Zn2 Zn2 59.30(2) 1_545 3_545 ?
Zn2 Zn2 Zn2 180.0 3 3_545 ?
N1 Zn2 Zn1 35.53(14) 5_556 6_546 ?
N1 Zn2 Zn1 144.47(14) 1_554 6_546 ?
Zn1 Zn2 Zn1 115.31(3) 5_565 6_546 ?
Zn1 Zn2 Zn1 64.69(3) 1_545 6_546 ?
Zn2 Zn2 Zn1 119.78(2) 3 6_546 ?
Zn2 Zn2 Zn1 60.22(2) 3_545 6_546 ?
N1 Zn2 Zn1 144.47(14) 5_556 2_564 ?
N1 Zn2 Zn1 35.53(14) 1_554 2_564 ?
Zn1 Zn2 Zn1 64.69(3) 5_565 2_564 ?
Zn1 Zn2 Zn1 115.31(3) 1_545 2_564 ?
Zn2 Zn2 Zn1 60.22(2) 3 2_564 ?
Zn2 Zn2 Zn1 119.78(2) 3_545 2_564 ?
Zn1 Zn2 Zn1 180.0 6_546 2_564 ?
Zn2 N1 Zn2 109.8(3) 3_556 1_556 ?
Zn2 N1 Zn1 109.60(17) 3_556 2_565 ?
Zn2 N1 Zn1 109.60(17) 1_556 2_565 ?
Zn2 N1 Zn1 105.08(17) 3_556 5_566 ?
Zn2 N1 Zn1 105.08(17) 1_556 5_566 ?
Zn1 N1 Zn1 117.4(3) 2_565 5_566 ?
 
_diffrn_measured_fraction_theta_max    0.991
_diffrn_reflns_theta_full              33.36
_diffrn_measured_fraction_theta_full   0.991
_refine_diff_density_max    2.896
_refine_diff_density_min   -2.869
_refine_diff_density_rms    0.478
