# Supplementary material
Source: MDPI journal article supplement (https://www.mdpi.com/2304-6740/4/4/29)
Supplement: s1 [file s1 › Zn2NCl0.47Br0.53.cif]

 
data_yangi02_sabs_xprep
 
_audit_creation_method            SHELXL-97
_chemical_name_systematic
;
 ?
;
_chemical_name_common             ?
_chemical_melting_point           ?
_chemical_formula_moiety          'Br0.53 Cl0.47 N Zn2'
_chemical_formula_sum
 'Br0.53 Cl0.47 N Zn2'
_chemical_formula_weight          203.87
 
loop_
 _atom_type_symbol
 _atom_type_description
 _atom_type_scat_dispersion_real
 _atom_type_scat_dispersion_imag
 _atom_type_scat_source
 'N'  'N'   0.0061   0.0033
 'International Tables Vol C Tables 4.2.6.8 and 6.1.1.4'
 'Cl'  'Cl'   0.1484   0.1585
 'International Tables Vol C Tables 4.2.6.8 and 6.1.1.4'
 'Zn'  'Zn'   0.2839   1.4301
 'International Tables Vol C Tables 4.2.6.8 and 6.1.1.4'
 'Br'  'Br'  -0.2901   2.4595
 'International Tables Vol C Tables 4.2.6.8 and 6.1.1.4'
 
_symmetry_cell_setting            orthorhombic
_symmetry_space_group_name_H-M    'P n a 21'
 
loop_
 _symmetry_equiv_pos_as_xyz
 'x, y, z'
 '-x, -y, z+1/2'
 'x+1/2, -y+1/2, z'
 '-x+1/2, y+1/2, z+1/2'
 
_cell_length_a                    6.168(2)
_cell_length_b                    7.538(3)
_cell_length_c                    6.026(2)
_cell_angle_alpha                 90.00
_cell_angle_beta                  90.00
_cell_angle_gamma                 90.00
_cell_volume                      280.17(18)
_cell_formula_units_Z             4
_cell_measurement_temperature     293(2)
_cell_measurement_reflns_used     797
_cell_measurement_theta_min       6.62
_cell_measurement_theta_max       30.45
 
_exptl_crystal_description        block
_exptl_crystal_colour             colorless
_exptl_crystal_size_max           0.03
_exptl_crystal_size_mid           0.03
_exptl_crystal_size_min           0.01
_exptl_crystal_density_meas       ?
_exptl_crystal_density_diffrn     4.833
_exptl_crystal_density_method     'not measured'
_exptl_crystal_F_000              374
_exptl_absorpt_coefficient_mu     24.816
_exptl_absorpt_correction_type    'multi-scan'
_exptl_absorpt_correction_T_min   0.4990
_exptl_absorpt_correction_T_max   0.7465
_exptl_absorpt_process_details    'SADABS'
 
_exptl_special_details
;
 ?
;
 
_diffrn_ambient_temperature       293(2)
_diffrn_radiation_wavelength      0.71073
_diffrn_radiation_type            MoK\a
_diffrn_radiation_source          'fine-focus sealed tube'
_diffrn_radiation_monochromator   graphite
_diffrn_measurement_device_type   'Bruker APEX-II CCD'
_diffrn_measurement_method        '\f and \w scans'
_diffrn_detector_area_resol_mean  ?
_diffrn_standards_number          0
_diffrn_standards_interval_count  ?
_diffrn_standards_interval_time   ?
_diffrn_standards_decay_%         ?
_diffrn_reflns_number             2455
_diffrn_reflns_av_R_equivalents   0.0366
_diffrn_reflns_av_sigmaI/netI     0.0480
_diffrn_reflns_limit_h_min        -8
_diffrn_reflns_limit_h_max        9
_diffrn_reflns_limit_k_min        -8
_diffrn_reflns_limit_k_max        11
_diffrn_reflns_limit_l_min        -8
_diffrn_reflns_limit_l_max        9
_diffrn_reflns_theta_min          5.45
_diffrn_reflns_theta_max          32.83
_reflns_number_total              892
_reflns_number_gt                 824
_reflns_threshold_expression      >2\s(I)
 
_computing_data_collection        'Bruker APEX2'
_computing_cell_refinement        'Bruker SAINT'
_computing_data_reduction         'Bruker SAINT'
_computing_structure_solution     'SHELXL-97 (Sheldrick, 2008)'
_computing_structure_refinement   'SHELXL-97 (Sheldrick, 2008)'
_computing_molecular_graphics     'Bruker SHELXTL'

_computing_publication_material   'Bruker SHELXTL'

 
_refine_special_details
;
 Refinement of F^2^ against ALL reflections.  The weighted R-factor wR and
 goodness of fit S are based on F^2^, conventional R-factors R are based
 on F, with F set to zero for negative F^2^. The threshold expression of
 F^2^ > 2\s(F^2^) is used only for calculating R-factors(gt) etc. and is
 not relevant to the choice of reflections for refinement.  R-factors based
 on F^2^ are statistically about twice as large as those based on F, and R-
 factors based on ALL data will be even larger.
;
 
_refine_ls_structure_factor_coef  Fsqd
_refine_ls_matrix_type            full
_refine_ls_weighting_scheme       calc
_refine_ls_weighting_details
 'calc w=1/[\s^2^(Fo^2^)+(0.0435P)^2^+0.0000P] where P=(Fo^2^+2Fc^2^)/3'
_atom_sites_solution_primary      direct
_atom_sites_solution_secondary    difmap
_refine_ls_extinction_method      none
_refine_ls_extinction_coef        ?
_refine_ls_abs_structure_details
 'Flack H D (1983), Acta Cryst. A39, 876-881'
_refine_ls_abs_structure_Flack    0.53(9)
_refine_ls_number_reflns          892
_refine_ls_number_parameters      38
_refine_ls_number_restraints      1
_refine_ls_R_factor_all           0.0403
_refine_ls_R_factor_gt            0.0371
_refine_ls_wR_factor_ref          0.0885
_refine_ls_wR_factor_gt           0.0867
_refine_ls_goodness_of_fit_ref    1.097
_refine_ls_restrained_S_all       1.097
_refine_ls_shift/su_max           0.000
_refine_ls_shift/su_mean          0.000
 
loop_
 _atom_site_label
 _atom_site_type_symbol
 _atom_site_fract_x
 _atom_site_fract_y
 _atom_site_fract_z
 _atom_site_U_iso_or_equiv
 _atom_site_adp_type
 _atom_site_occupancy
 _atom_site_symmetry_multiplicity
 _atom_site_calc_flag
 _atom_site_refinement_flags
 _atom_site_disorder_assembly
 _atom_site_disorder_group
Br1 Br 0.08107(13) 0.12201(12) 0.68891(14) 0.0157(3) Uani 0.533(8) 1 d P . .
Cl1 Cl 0.08107(13) 0.12201(12) 0.68891(14) 0.0157(3) Uani 0.467(8) 1 d P . .
Zn1 Zn 0.87415(12) 0.82228(12) 0.64994(16) 0.0204(2) Uani 1 1 d . . .
Zn2 Zn 0.97750(14) 0.46071(15) 0.47667(16) 0.0244(2) Uani 1 1 d . . .
N1 N 0.9284(7) 0.3733(7) 0.1907(10) 0.0112(8) Uani 1 1 d . . .
 
loop_
 _atom_site_aniso_label
 _atom_site_aniso_U_11
 _atom_site_aniso_U_22
 _atom_site_aniso_U_33
 _atom_site_aniso_U_23
 _atom_site_aniso_U_13
 _atom_site_aniso_U_12
Br1 0.0152(4) 0.0158(4) 0.0162(4) -0.0002(3) 0.0004(3) -0.0004(3)
Cl1 0.0152(4) 0.0158(4) 0.0162(4) -0.0002(3) 0.0004(3) -0.0004(3)
Zn1 0.0123(3) 0.0198(4) 0.0291(4) 0.0006(3) 0.0010(3) 0.0049(3)
Zn2 0.0234(4) 0.0287(5) 0.0211(4) -0.0120(4) -0.0058(3) 0.0012(4)
N1 0.0077(16) 0.015(2) 0.0108(19) 0.0016(19) 0.0012(16) -0.0010(16)
 
_geom_special_details
;
 All s.u.'s (except the s.u. in the dihedral angle between two l.s. planes)
 are estimated using the full covariance matrix.  The cell s.u.'s are taken
 into account individually in the estimation of s.u.'s in distances, angles
 and torsion angles; correlations between s.u.'s in cell parameters are only
 used when they are defined by crystal symmetry.  An approximate (isotropic)
 treatment of cell s.u.'s is used for estimating s.u.'s involving l.s. planes.
;
 
loop_
 _geom_bond_atom_site_label_1
 _geom_bond_atom_site_label_2
 _geom_bond_distance
 _geom_bond_site_symmetry_2
 _geom_bond_publ_flag
Br1 Zn1 2.6055(15) 1_445 ?
Br1 Zn1 2.8230(17) 2_665 ?
Br1 Zn2 2.8292(15) 3_455 ?
Br1 Zn2 2.9261(17) 1_455 ?
Zn1 N1 1.921(5) 4_655 ?
Zn1 N1 1.928(5) 2_765 ?
Zn1 Br1 2.6055(15) 1_665 ?
Zn1 Cl1 2.6055(15) 1_665 ?
Zn1 Br1 2.8230(17) 2_664 ?
Zn1 Zn2 2.9874(17) . ?
Zn1 Zn2 3.0437(15) 2_765 ?
Zn1 Zn2 3.1097(14) 4_655 ?
Zn1 Zn2 3.1228(14) 3_465 ?
Zn2 N1 1.870(6) . ?
Zn2 N1 1.888(6) 2_765 ?
Zn2 Br1 2.8292(15) 3 ?
Zn2 Br1 2.9261(17) 1_655 ?
Zn2 Zn1 3.0437(15) 2_764 ?
Zn2 Zn2 3.0830(12) 2_764 ?
Zn2 Zn2 3.0830(12) 2_765 ?
Zn2 Zn1 3.1097(14) 4_644 ?
Zn2 Zn1 3.1228(14) 3_565 ?
N1 Zn2 1.888(6) 2_764 ?
N1 Zn1 1.921(5) 4_644 ?
N1 Zn1 1.928(5) 2_764 ?
 
loop_
 _geom_angle_atom_site_label_1
 _geom_angle_atom_site_label_2
 _geom_angle_atom_site_label_3
 _geom_angle
 _geom_angle_site_symmetry_1
 _geom_angle_site_symmetry_3
 _geom_angle_publ_flag
Zn1 Br1 Zn1 105.40(4) 1_445 2_665 ?
Zn1 Br1 Zn2 101.04(5) 1_445 3_455 ?
Zn1 Br1 Zn2 113.14(4) 2_665 3_455 ?
Zn1 Br1 Zn2 127.61(5) 1_445 1_455 ?
Zn1 Br1 Zn2 108.76(4) 2_665 1_455 ?
Zn2 Br1 Zn2 100.57(4) 3_455 1_455 ?
N1 Zn1 N1 138.6(2) 4_655 2_765 ?
N1 Zn1 Br1 106.91(16) 4_655 1_665 ?
N1 Zn1 Br1 110.00(15) 2_765 1_665 ?
N1 Zn1 Cl1 106.91(16) 4_655 1_665 ?
N1 Zn1 Cl1 110.00(15) 2_765 1_665 ?
Br1 Zn1 Cl1 0.00(4) 1_665 1_665 ?
N1 Zn1 Br1 101.01(19) 4_655 2_664 ?
N1 Zn1 Br1 100.21(19) 2_765 2_664 ?
Br1 Zn1 Br1 84.94(3) 1_665 2_664 ?
Cl1 Zn1 Br1 84.94(3) 1_665 2_664 ?
N1 Zn1 Zn2 115.75(17) 4_655 . ?
N1 Zn1 Zn2 38.01(17) 2_765 . ?
Br1 Zn1 Zn2 135.90(4) 1_665 . ?
Cl1 Zn1 Zn2 135.90(4) 1_665 . ?
Br1 Zn1 Zn2 76.76(4) 2_664 . ?
N1 Zn1 Zn2 110.46(18) 4_655 2_765 ?
N1 Zn1 Zn2 36.08(18) 2_765 2_765 ?
Br1 Zn1 Zn2 113.71(5) 1_665 2_765 ?
Cl1 Zn1 Zn2 113.71(5) 1_665 2_765 ?
Br1 Zn1 Zn2 135.34(4) 2_664 2_765 ?
Zn2 Zn1 Zn2 61.48(3) . 2_765 ?
N1 Zn1 Zn2 34.35(19) 4_655 4_655 ?
N1 Zn1 Zn2 128.07(19) 2_765 4_655 ?
Br1 Zn1 Zn2 89.64(4) 1_665 4_655 ?
Cl1 Zn1 Zn2 89.64(4) 1_665 4_655 ?
Br1 Zn1 Zn2 129.89(4) 2_664 4_655 ?
Zn2 Zn1 Zn2 132.55(5) . 4_655 ?
Zn2 Zn1 Zn2 92.03(5) 2_765 4_655 ?
N1 Zn1 Zn2 34.60(18) 4_655 3_465 ?
N1 Zn1 Zn2 159.73(17) 2_765 3_465 ?
Br1 Zn1 Zn2 87.69(4) 1_665 3_465 ?
Cl1 Zn1 Zn2 87.69(4) 1_665 3_465 ?
Br1 Zn1 Zn2 70.72(3) 2_664 3_465 ?
Zn2 Zn1 Zn2 121.89(5) . 3_465 ?
Zn2 Zn1 Zn2 144.98(4) 2_765 3_465 ?
Zn2 Zn1 Zn2 59.29(3) 4_655 3_465 ?
N1 Zn2 N1 155.9(2) . 2_765 ?
N1 Zn2 Br1 101.47(15) . 3 ?
N1 Zn2 Br1 95.92(17) 2_765 3 ?
N1 Zn2 Br1 97.51(17) . 1_655 ?
N1 Zn2 Br1 102.28(18) 2_765 1_655 ?
Br1 Zn2 Br1 78.39(4) 3 1_655 ?
N1 Zn2 Zn1 127.53(17) . . ?
N1 Zn2 Zn1 38.95(16) 2_765 . ?
Br1 Zn2 Zn1 81.87(4) 3 . ?
Br1 Zn2 Zn1 133.62(5) 1_655 . ?
N1 Zn2 Zn1 37.39(16) . 2_764 ?
N1 Zn2 Zn1 144.47(15) 2_765 2_764 ?
Br1 Zn2 Zn1 113.44(4) 3 2_764 ?
Br1 Zn2 Zn1 66.77(4) 1_655 2_764 ?
Zn1 Zn2 Zn1 158.38(5) . 2_764 ?
N1 Zn2 Zn2 35.08(17) . 2_764 ?
N1 Zn2 Zn2 120.8(2) 2_765 2_764 ?
Br1 Zn2 Zn2 124.19(5) 3 2_764 ?
Br1 Zn2 Zn2 125.11(5) 1_655 2_764 ?
Zn1 Zn2 Zn2 100.69(6) . 2_764 ?
Zn1 Zn2 Zn2 58.36(4) 2_764 2_764 ?
N1 Zn2 Zn2 169.42(18) . 2_765 ?
N1 Zn2 Zn2 34.68(18) 2_765 2_765 ?
Br1 Zn2 Zn2 71.24(4) 3 2_765 ?
Br1 Zn2 Zn2 73.79(5) 1_655 2_765 ?
Zn1 Zn2 Zn2 60.16(4) . 2_765 ?
Zn1 Zn2 Zn2 137.71(6) 2_764 2_765 ?
Zn2 Zn2 Zn2 155.50(8) 2_764 2_765 ?
N1 Zn2 Zn1 35.43(14) . 4_644 ?
N1 Zn2 Zn1 150.36(15) 2_765 4_644 ?
Br1 Zn2 Zn1 67.00(4) 3 4_644 ?
Br1 Zn2 Zn1 97.83(4) 1_655 4_644 ?
Zn1 Zn2 Zn1 112.24(4) . 4_644 ?
Zn1 Zn2 Zn1 64.22(3) 2_764 4_644 ?
Zn2 Zn2 Zn1 60.57(3) 2_764 4_644 ?
Zn2 Zn2 Zn1 138.24(5) 2_765 4_644 ?
N1 Zn2 Zn1 128.30(16) . 3_565 ?
N1 Zn2 Zn1 35.29(15) 2_765 3_565 ?
Br1 Zn2 Zn1 129.91(4) 3 3_565 ?
Br1 Zn2 Zn1 98.04(4) 1_655 3_565 ?
Zn1 Zn2 Zn1 64.69(3) . 3_565 ?
Zn1 Zn2 Zn1 110.35(4) 2_764 3_565 ?
Zn2 Zn2 Zn1 98.95(5) 2_764 3_565 ?
Zn2 Zn2 Zn1 60.14(3) 2_765 3_565 ?
Zn1 Zn2 Zn1 159.06(5) 4_644 3_565 ?
Zn2 N1 Zn2 110.2(3) . 2_764 ?
Zn2 N1 Zn1 110.2(3) . 4_644 ?
Zn2 N1 Zn1 110.1(3) 2_764 4_644 ?
Zn2 N1 Zn1 106.5(3) . 2_764 ?
Zn2 N1 Zn1 103.0(3) 2_764 2_764 ?
Zn1 N1 Zn1 116.4(3) 4_644 2_764 ?
 
_diffrn_measured_fraction_theta_max    0.984
_diffrn_reflns_theta_full              32.83
_diffrn_measured_fraction_theta_full   0.984
_refine_diff_density_max    1.136
_refine_diff_density_min   -1.147
_refine_diff_density_rms    0.295
